# Supplementary material for: An Exact Approach for Solving Pickup-and-Delivery Traveling Salesman Problems with Neighborhoods
Source: Atypon-hosted journal article supplement (doi:10.1287/trsc.2022.0138), 2023-08-31
Supplement: trsc.2022.0138.sm1.pdf [file trsc.2022.0138.sm1.pdf]

## Appendix A: Mathematical Proofs

In this appendix, we provide the proofs of all the mathematical statements that appear in the paper. In order to facilitate the reading experience, we accompany each proof with its corresponding statement as it originally appears in the main document. All statements and proofs are provided in the same order of appearance.

**PROPOSITION 1.** *A PDTSPN instance that satisfies Assumption 1 admits an optimal tour that visits each neighborhood exactly once. Moreover, such tour is a shortest Hamiltonian tour where the visits take place at some set of points  $\{p_i\}_{i \in I}$ , where  $p_i \in U_i$  for all  $i \in I$ .*

**Proof.** Given the problem's setting, each neighborhood except  $U_0$  has either  $d_i > 0$  or  $s_i > 0$ . Hence, to satisfy all the pickup and delivery requirements, the vehicle needs to visit each neighborhood at least once. For the first claim, all is left to show is that there exists an optimal tour that visits each neighborhood at most once. Notice that the problem is feasible by the first statement in Assumption 1 and the optimality is always obtainable due to the compactness of all the neighborhoods. So, we can start with an arbitrarily selected optimal tour  $\gamma$  that is represented by the sequence  $(p_0, p_1, p_2, \dots, p_n)$ , i.e., a closed tour that starts and ends at  $p_0$  and traverses from  $p_1$  to  $p_n$  in between, where every point  $p_k$  belongs to some neighborhood  $U_i$  that may have been visited more than once. We call the number of visits to a neighborhood  $U_i$  in this sequence the multiplicity of  $U_i$ . If the multiplicity of every neighborhood is one in  $\gamma$ , we are done. Now, suppose otherwise, then the following procedure will reduce by one the multiplicity of any neighborhood that has been visited repeatedly in  $\gamma$ . By applying this process as many times as necessary, one can produce an optimal tour that is Hamiltonian, thus proving the claim.

The procedure is as follows. If a neighborhood that has been visited multiple times, say neighborhood  $U_i$ , is a demand neighborhood, then we use  $p_k$  and  $p_{k'}$  to denote the points in  $\gamma$  that visit  $U_i$  the first two times, and let  $l_k$  and  $l_{k'}$  be the corresponding delivered commodities during each visit. Then, we split the tour  $\gamma$  into several subpaths as

$$\gamma = (p_0 \rightsquigarrow p_{k-1} \rightarrow p_k \rightarrow p_{k+1} \rightsquigarrow p_{k'} \rightsquigarrow p_n),$$

where " $\rightarrow$ " means no other neighborhoods are visited in between and " $\rightsquigarrow$ " indicates that potentially multiple neighborhoods are visited in between. We construct the following new tour

$$\gamma' = (p_0 \rightsquigarrow p_{k-1} \rightarrow p_{k+1} \rightsquigarrow p_{k'} \rightsquigarrow p_n).$$

Let  $v, v'$  be two vehicles following tours  $\gamma$  and  $\gamma'$ , respectively. Comparing with  $v$ , vehicle  $v'$  will only take two different actions in tour  $\gamma'$ : it skips the stop  $p_k$  and it drops  $l_k + l_{k'}$  commodities at point  $p_{k'}$ . By this design, before the point  $p_{k-1}$  and after the point  $p_{k'}$ , the two vehicles are at the same state in their routes, i.e., at each fixed time, they are at the same location with the same amount of commodities. For the tour between  $p_{k-1}$  and  $p_{k'}$ , it is obvious that the second tour is no longer than the first tour (in fact, they have the same length since  $\gamma$  is assumed to be optimal). We only need to show this new construction is possible between  $p_{k+1}$  and  $p_{k'}$ . Notice at the time of reaching  $p_{k+1}$ , vehicle  $v$  holds strictly less commodities than vehicle  $v'$ . Along with the second statement in Assumption 1, it is clear that  $v'$  can always replicate the

actions that  $v$  takes in the subpath between  $p_{k+1}$  and  $p_{k'}$ . Thus, we have reduced the multiplicity of the neighborhood  $U_i$  by one in this case. A similar procedure and argument can be applied to the case that the repeatedly visited neighborhood is a supply neighborhood. So, we proved the first claim.

Therefore, we can focus on all the tours that visit each neighborhood exactly once. That consists of all the closed tours that pass through some point set  $\{p_i\}_{i \in I}$  with  $p_i \in U_i$  for all  $i \in I$ . Now, because the shortest closed tour for each such fixed point set  $\{p_i\}_{i \in I}$  is a Hamiltonian tour, so is the global optimal tour among all the possible point sets.  $\square$

LEMMA 1. *If the point  $p_k$  is a turning point in an optimal sequence  $\gamma^*$ , then the set of active neighborhoods  $\mathcal{U}_k$  is nonempty.*

Proof.  $\mathcal{U}_k = \emptyset$  implies either that no neighborhood contains  $p_k$  or, if one does, say  $U_i$ , then  $U_i$  is also intersected by the complement path  $\bar{P}_k$ . Clearly, in both cases, the sequence  $\gamma' = (p_0, \dots, p_{k-1}, p_{k+1}, \dots, p_n)$  also visits  $U_i$ . Moreover,  $p_k$  being a turning point implies that  $\gamma'$  is strictly shorter than the original optimal sequence, which leads to a contradiction.  $\square$

THEOREM 1. *If  $p_k$  is a turning point in an optimal sequence  $\gamma^*$ , then there must exist a neighborhood  $U_i \in \mathcal{U}_k$  such that  $U_i \cap P_k = \{p_k\}$ . Moreover, if all neighborhoods in  $\mathcal{U}_k$  are also path-connected, then there is some  $U_i \in \mathcal{U}_k$  such that  $U_i \cap T_k = \{p_k\}$ .*

Proof. We prove the first statement by contradiction. Let  $p_k$  be a turning point such that all neighborhoods  $U_i \in \mathcal{U}_k$  intersect with  $P_k$  at more points than just  $p_k$ . Then, we will construct a strictly shorter feasible sequence  $\gamma'$  that still visits all the neighborhoods, which contradicts the optimality of  $\gamma^*$ . Let  $p_{k-1}$  and  $p_{k+1}$  be the previous and next points of  $p_k$  in  $\gamma^*$ , and let  $[p_{k-1}, p_k)$  and  $(p_k, p_{k+1}]$  represent the half-open line segment between the two endpoints. For each  $U_i \in \mathcal{U}_k$ , we define two sets

$$L_i = \arg \max_{p \in U_i \cap [p_{k-1}, p_k)} \delta(p, p_k),$$

$$R_i = \arg \max_{p \in U_i \cap (p_k, p_{k+1}]} \delta(p, p_k).$$

Thus,  $L_i$  (or  $R_i$ ) contains the points in the intersection of  $U_i$  and the segment  $[p_{k-1}, p_k)$  (or  $(p_k, p_{k+1}]$ ) that is the farthest to point  $p_k$ . Notice that,  $L_i$  (or  $R_i$ ) is either a singleton or an empty set, but  $L_i \cup R_i$  must be nonempty by the choice of  $U_i$ . Then, we define the following two sets

$$L = \arg \min_{p \in \bigcup_{i \in I_k} L_i} \delta(p, p_k),$$

$$R = \arg \min_{p \in \bigcup_{i \in I_k} R_i} \delta(p, p_k),$$

where  $I_k$  is the index set of the neighborhoods in  $\mathcal{U}_k$ . Thus,  $L$  (or  $R$ ) contains the points that are closest to  $p_k$  among all the points in the union  $\bigcup_{i \in I_k} L_i$  (or  $\bigcup_{i \in I_k} R_i$ ). By the assumption on all  $U_i$ 's,  $L \cup R \neq \emptyset$ . Thus, we are left with three possible cases. In the first case, we have  $L = \emptyset$  and  $R \neq \emptyset$ . This means each  $U_i \in \mathcal{U}_k$  intersects some point in  $(p_k, p_{k+1}]$ . Take any  $r \in R$ , we construct a feasible sequence  $\gamma' = (p_0, \dots, p_{k-1}, r, p_{k+1}, \dots, p_n)$ , which replaces  $p_k$  with  $r$ . In the second case,  $L \neq \emptyset$  but  $R = \emptyset$ . Similarly, we

construct  $\gamma'$  by replacing  $p_k$  with  $l$  for any  $l \in L$ . In the last case, both  $L$  and  $R$  are nonempty. Then, we define  $\gamma' = (p_0, \dots, p_{k-1}, l, r, p_{k+1}, \dots, p_n)$  for  $l \in L$  and  $r \in R$ . In all three cases, it is easy to check that the new sequence  $\gamma'$  covers all the neighborhoods in  $\mathcal{U}_k$  by the construction and is strictly shorter than  $\gamma^*$  by Lemma 2, which contradicts that  $\gamma^*$  is optimal. Hence, we proved the first claim.

For the second statement, suppose every  $U_i \in \mathcal{U}_k$  intersects the triangle  $T_k$  at some point  $q_i \neq p_k$ . Then, we can partition the neighborhoods in  $\mathcal{U}_k$  into two groups  $\mathcal{U}_k^1$  and  $\mathcal{U}_k^2$ . The former contains neighborhoods that have a path  $q_i \rightsquigarrow p_k$  inside the inner region enclosed by the closed curve  $\gamma^*$ ; the latter includes all the rest neighborhoods, each of which must have a path  $q_i \rightsquigarrow p_k$  intersects the path  $P_k$ , because, otherwise, they must have a path  $q_i \rightsquigarrow p_k$  intersects the complement path  $\bar{P}_k$ , which makes  $U_i$  non-active by Definition 3, a contradiction. Notice that  $\mathcal{U}_k^1$  is nonempty, otherwise, all neighborhoods in  $\mathcal{U}_k$  intersect  $P_k$ , which contradicts the first statement we have just shown. For each  $U_i \in \mathcal{U}_k^1$ , let  $\omega_i$  be a path connecting  $q_i$  to  $p_k$  and is inside the inner region enclosed by  $\gamma^*$ , and let  $C_\epsilon$  be a circle of radius  $\epsilon$  centered at  $p_k$ . Then, for a sufficiently small scalar  $\epsilon > 0$ , the circle  $C_\epsilon$  intersects all the paths  $\omega_i$ 's as well as the half open line segments  $[p_{k-1}, p_k)$  and  $(p_k, p_{k+1}]$ . We use  $l$  and  $r$  to denote the intersection points of  $C_\epsilon$  with  $[p_{k-1}, p_k)$  and  $(p_k, p_{k+1}]$ , respectively. Then, the new sequence  $\gamma' = (p_0, \dots, p_{k-1}, l, r, p_{k+1}, \dots, p_n)$  visits all the neighborhoods in  $\mathcal{U}_k^1$  since the line segment  $[l, r]$  intersects all the paths  $\omega_i$ 's. Moreover, for a sufficiently small  $\epsilon > 0$ ,  $\gamma'$  also intersects all neighborhoods in  $\mathcal{U}_k^2$ , since the intersection points of each neighborhood  $U_i \in \mathcal{U}_k^2$  and the path  $P_k$  have a fixed positive distance to  $p_k$ . Furthermore, the new curve  $\gamma'$  is strictly shorter than  $\gamma^*$  by the construction and the triangle inequality, which contradicts the optimality of  $\gamma^*$ .  $\square$

**COROLLARY 1.** *Let  $p_k$  be any turning point of an optimal sequence  $\gamma^*$  and  $\mathcal{U}_k$  be the associated active neighborhoods. If all neighborhoods in  $\mathcal{U}_k$  are disjoint, then the unique choice  $U_i \in \mathcal{U}_k$  satisfies  $U_i \cap T_k = \{p_k\}$  for all  $k$ .*

*Proof.* Because all neighborhoods are disjoint, each turning point can belong to exactly one  $U_i$ . This shows that  $\mathcal{U}_k$  contains only one neighborhood. By the first statement of Theorem 1,  $U_i \cap P_k = \{p_k\}$ . Suppose  $U_i$  also intersects  $T_k$  at some point  $q_i \neq p_k$ . By Lemma 2, replacing  $q_i$  with  $p_k$  in  $\gamma^*$  produces a strictly shorter feasible sequence, which is a contradiction.  $\square$

**THEOREM 2.** *Given a set of neighborhoods  $\mathcal{U}$ , a BPC separator  $H$  of  $\mathcal{U}$ , and a visiting sequence  $\sigma$ , every non-redundant local optimal tour  $\gamma_\sigma^*$  is inside the half-plane  $H$ .*

*Proof.* Let  $\mathbf{p} = (p_i)_{i \in I_0}$  be the local optimal curve  $\gamma_\sigma^*$ , where  $p_i \in U_i$  for each  $i \in I_0$  and  $p_i$  is either a turning or a passing point. Without loss of generality, we assume that the index set  $I_0$  is sorted by the visiting order  $\sigma$ . We use  $\hat{\mathbf{p}}$  to denote the corresponding point set  $\{p_i\}_{i \in I_0}$ . Clearly, if  $\hat{\mathbf{p}} \subseteq H$ , then the entire tour  $\gamma_\sigma^*$  also lies within the half-plane  $H$ . Suppose otherwise that  $\hat{\mathbf{p}} \not\subseteq H$ . Then, there are two possible cases: either all or part of the points in  $\hat{\mathbf{p}}$  lie in the complement of  $H$ .

In the former case, we claim that the projected tour  $\text{proj}_H(\mathbf{p}) = (\text{proj}_H(p_i))_{i \in I_0}$  visits every neighborhood  $U_i$  in the order of  $\sigma$  and is strictly shorter than  $\gamma_\sigma^*$ , which induces a contradiction. By assumption,  $\gamma_\sigma^*$  does not lie in a straight line that parallels to  $\partial H$ , which implies the projection of  $\gamma_\sigma^*$  onto  $\partial H$  is strictly shorter than  $\gamma_\sigma^*$ . It is left to show that  $\text{proj}_H(p_i) \in U_i$  for each  $i \in I_0$ . If the point  $p_i$  is on the boundary of  $U_i$ , then

$\text{proj}_H(p_i) \in U_i$  is true due to  $H$  is a BPC separator of  $U_i$ . Otherwise,  $p_i$  is an interior point of  $U_i$ . Then, the line extended from the line segment  $[\text{proj}_H(p_i), p_i]$  intersects  $U_i$  at some point  $p'_i \in \partial U_i \setminus H$ . Then, we have  $\text{proj}_H(p_i) = \text{proj}_H(p'_i) \in U_i$ , where the equality is by the construction of  $p'_i$  and the membership relation is due to  $H$  is a BPC separator of  $U_i$ .

In the latter case, some point  $p_0 \in \hat{\mathbf{p}}$  is in the half-plane  $H$ . Then, we represent  $\gamma_\sigma^*$  as a continuous function from the closed interval  $[0, 1]$  to  $\mathbb{R}^2$  such that  $\gamma_\sigma^*(0) = \gamma_\sigma^*(1) = p_0$ , and  $\gamma_\sigma^*(t_i) = p_i$  for all  $i \in I_0$ . By assumption, there is also some point in  $\hat{\mathbf{p}}$  that is not in  $H$ , i.e.,  $\gamma_\sigma^*(t_i) \notin H$  for some  $i \in I$ , where  $I$  is the index set  $I_0 \setminus \{0\}$ . The fact that  $\gamma_\sigma^*$  is a continuous function means there exists some closed neighborhood  $T = [t_{\min}, t_{\max}] \subseteq [0, 1]$  of  $t_i$  such that the path  $\gamma_\sigma^*(T)$  intersects  $H$  only at the two endpoints  $p_{\min} = \gamma_\sigma^*(t_{\min})$  and  $p_{\max} = \gamma_\sigma^*(t_{\max})$ . Let  $T' = (t_{\min}, t_{\max})$  be the corresponding open interval of  $T$ , and we use the set  $I' = \{i \in I \mid t_i \in T'\}$  to label all the neighborhoods that are visited by the path  $\gamma_\sigma^*(T')$ . Then, we consider the following projected sequence

$$\text{proj}_H(\gamma_\sigma^*(T)) = (p_{\min}, (\text{proj}_H(p_i))_{i \in I'}, p_{\max}).$$

This sequence represents a subtour that visits all the neighborhoods  $\{U_i\}_{i \in I'}$  with the same visiting order since  $H$  is a BPC separator of  $\mathcal{U}$ . Also,  $\text{proj}_H(\gamma_\sigma^*(T))$  is strictly shorter than the original segment  $\gamma_\sigma^*(T)$  since the tour is non-redundant. Moreover,  $\text{proj}_H(\gamma_\sigma^*(T))$  and  $\gamma_\sigma^*(T)$  shares the same endpoints. Thus, replacing the subtour  $\gamma_\sigma^*(T)$  in  $\gamma_\sigma^*$  with the projected sequence produces a strictly shorter feasible solution, which yields a contradiction.  $\square$

**COROLLARY 2.** *Given a set of compact neighborhoods  $\mathcal{U}$ , if the optimal tour  $\gamma^*$  does not lie in a straight line, then the domination hull  $D_{\mathcal{U}}$  is a nonempty, convex, compact set.*

*Proof.* By Theorem 2, given that some optimal curve  $\gamma^*$  is non-redundant, then  $\gamma^*$  lies in  $D_{\mathcal{U}}$ , which shows  $D_{\mathcal{U}}$  is nonempty.  $D_{\mathcal{U}}$  is convex and closed since it is the intersection of a set of half-planes. Finally, by definition, a sufficiently large polygon that contains all the neighborhoods can be produced by the intersection of a set of BPC separators. Thus, it also contains  $D_{\mathcal{U}}$ , which means  $D_{\mathcal{U}}$  is bounded, which entails compactness.  $\square$

**PROPOSITION 2.** *Given a set of convex neighborhoods  $\mathcal{U}$ , the binary search subroutine described in Algorithm 2 converges to the minimized distance*

$$\begin{aligned} \min d \\ \text{s.t. } H_{\theta, d} \in \mathcal{H}_{\mathcal{U}}, \\ d \in [0, r], \end{aligned}$$

when  $\epsilon \rightarrow 0$ .

*Proof.* Given the initial input  $(0, r, \theta, \mathcal{U})$ , it suffices to show that, for any value  $c \in (0, r)$ , if  $H_{\theta, c}$  is a BPC separator, then so is  $H_{\theta, b}$  for all  $b \in (c, r]$ ; if  $H_{\theta, c}$  is not a BPC separator, neither is  $H_{\theta, a}$  for all  $a \in [0, c)$ . To prove the former, we suppose  $H_{\theta, c}$  is a BPC separator of  $\mathcal{U}$ , i.e., it is a BPC separator for every  $U \in \mathcal{U}$ .

Take any  $U \in \mathcal{U}$  and  $b \in (c, r]$ , the boundary points that are not contained in the half-plane  $H_{\theta, b}$  is denoted by  $\partial U \setminus H_{\theta, b}$ . Clearly, we have the following

$$\partial U \setminus H_{\theta, b} \subseteq \partial U \setminus H_{\theta, c}.$$

Hence, for every  $p \in \partial U \setminus H_{\theta, b}$ , the projection  $\text{proj}_{H_{\theta, c}}(p)$  is inside  $U$ , since  $H_{\theta, c}$  is BPC separator of  $U$  by assumption. Moreover, because  $H_{\theta, b}$  is parallel to  $H_{\theta, c}$ , the line segment  $[p, \text{proj}_{H_{\theta, c}}(p)]$  intersects the line  $\partial H_{\theta, b}$  at the projection point  $\text{proj}_{H_{\theta, b}}(p)$ . Thus,  $\text{proj}_{H_{\theta, b}}(p) \in U$  due to the convexity of  $U$ , which shows  $H_{\theta, b}$  is a BPC separator of  $U$  by definition. For the latter statement, we take any  $a \in [0, c)$  and assume  $H_{\theta, c}$  is not a BPC separator of  $\mathcal{U}$ . That is, for some  $U \in \mathcal{U}$ ,  $H_{\theta, c}$  is not a BPC separator of  $U$ . This means for some point  $p \in \partial U \setminus H_{\theta, c}$ , the projection  $\text{proj}_{H_{\theta, c}}(p)$  is not in  $U$ . Same as before, the point  $p$  belongs to  $\partial U \setminus H_{\theta, a}$ . Towards a contradiction, suppose  $H_{\theta, a}$  is a BPC separator of  $\mathcal{U}$ , then  $\text{proj}_{H_{\theta, a}}(p) \in U$ . Same as before, the segment  $[p, \text{proj}_{H_{\theta, a}}(p)]$  intersects the line  $\partial H_{\theta, c}$  at the projection point  $\text{proj}_{H_{\theta, c}}(p)$ . Then, the convexity of  $U$  implies  $\text{proj}_{H_{\theta, c}}(p) \in U$ , which contradicts the choice of  $p$ . This concludes the proof.  $\square$

**PROPOSITION 3.** *Given non-convex region representations in (3f), the cut generation implementation of (5) with GBCs from (7) solves for an optimal solution of (3).*

*Proof.* Every  $u \in E_{sd}$  represents a feasible sequence of neighborhoods. Hence, after solving the corresponding subproblem  $\Phi(u)$  optimally, the right-hand-side of new constraint (7) enforces the actual length of the shortest Hamiltonian tour under the given sequence  $u$ . Therefore, regardless of the convexity of (3f), the GBCs from (7) yield a sharp underestimator  $\theta$  of the tour length, which guarantees the correctness of the cut generation method from the classic upper and lower bounding argument of the Benders decomposition.  $\square$
